# Supplementary material
Source: Copernicus journal article supplement (doi:10.5194/egusphere-2026-3055)
Supplement: Supplementary file 1 [file egusphere-2026-3055-supplement.pdf]

*Supplementary material of*

**Taxon-specific coccolithophore carbonate stocks and production across a Pacific trophic gradient from oligotrophic gyre to upwelling zone**

Guillaume Lassus<sup>1,2</sup>, Luc Beaufort<sup>1</sup>, Martine Couapel<sup>1\*</sup>, David Mendels<sup>2</sup>

<sup>1</sup>Aix-Marseille Université, CNRS, IRD, INRAE, CEREGE, Aix-en-Provence, France

<sup>2</sup>ZORTH, 10, Rue Mazarine, 13100, Aix-en-Provence, France

\*Present address: MARBEC, Avenue Jean Monnet, Sète, France

*Correspondence to:* Guillaume Lassus (guillaume.lassus8@orange.fr)

## S1 Supplementary Tables

**Table S1.** Geographic coordinates and cumulative distances between BIOSOPE sampling stations. Distances were used to support spatial integration of abundance and coccosphere-associated CaCO<sub>3</sub> stock data across the transect.

| Stations | Latitude (°N) | Longitude (°W) | Distance (km) | Distance (m) |
|----------|---------------|----------------|---------------|--------------|
| SE3      | -9.93         | 142.26         |               |              |
| MAR1     | -8.39         | 141.24         | 205.04        | 205035.00    |
| HLN1     | -9.01         | 136.87         | 485.32        | 485323.00    |
| STB1     | -11.75        | 134.09         | 430.38        | 430378.00    |
| STB2     | -13.53        | 132.14         | 289.71        | 289713.00    |
| STB3     | -15.52        | 129.91         | 325.93        | 325932.00    |
| STB4     | -17.22        | 127.96         | 281.46        | 281461.00    |
| STB7     | -22.03        | 120.33         | 961.45        | 961451.00    |
| GYR2     | -26.02        | 114.01         | 779.93        | 779928.00    |
| STB11    | -27.76        | 107.27         | 695.81        | 695812.00    |
| STB13    | -29.22        | 101.47         | 589.26        | 589262.00    |
| STB14    | -30.03        | 98.39          | 311.04        | 311035.00    |
| STB15    | -30.77        | 95.45          | 293.88        | 293877.00    |
| EGY2     | -31.83        | 91.46          | 397.09        | 397087.00    |
| STB17    | -32.39        | 86.79          | 444.14        | 444143.00    |
| STB18    | -32.69        | 84.07          | 257.09        | 257089.00    |
